# Supplementary material for: Enhancing the stability of poly(ionic liquids)@MOFs@COFs via core–shell protection strategy for 99TcO4− sequestration
Source: Royal Society of Chemistry journal article supplement (doi:10.1039/d2qi02147a), 2022-12-05
Supplement: d2qi02147a1.pdf [file d2qi02147a1.pdf]

## Supporting Information

### **Enhancing the Stability of Poly(ionic liquids)@MOFs@COFs via Core-Shell Protection Strategy for $^{99}\text{TcO}_4^-$ Sequestration**

*Zhengyi Di,<sup>a</sup> Zhao-Fei Liu,<sup>a</sup> Hai-Ruo Li,<sup>a</sup> Zhong Liu,<sup>b,\*</sup> and Cheng-Peng Li<sup>a,\*</sup>*

#### **Material and methods**

##### *1.1 Materials and characterization methods*

Commercially available reagents were used directly.  $^1\text{H}$  NMR spectra were recorded on a Bruker AV 400 spectrometer, and the chemical shifts were reported in ppm with respect to reference standards. FT-IR spectra were taken on a Bruker ALPHA FT-IR spectrometer (KBr pellets) in  $4000\text{--}400\text{ cm}^{-1}$ . Powder X-ray diffraction (PXRD) patterns were recorded on a Bruker D8 Advance diffractometer ( $\text{Cu-K}\alpha$ ,  $\lambda = 1.5406\text{ \AA}$ ), operating at 40 kV and 100 mA, and the intensity data were obtained by the continuous scans in the  $2\theta/\theta$  mode with scan speed of 2 s/step and step size of  $0.02^\circ$ . X-ray photoelectron spectroscopy (XPS) measurements were taken on a Thermo Scientific ESCALAB 250Xi spectrometer. The scanning transmission electron microscope (STEM) and energy-dispersive X-ray spectroscopy (EDS) were taken on a Thermo Fisher Scientific Talos F200X scanning electron microscope, with the electron beam energy of 200 keV.  $\text{N}_2$  sorption isotherms at 77 K were obtained on Micromeritics

ASAP 2020 HD88. The  $\text{ReO}_4^-$  concentrations in solution were determined on a Perkin-Elmer NexION 350D inductively coupled plasma mass spectrometer (ICP-MS) after degradation of the sample in  $\text{HNO}_3$ . Thermogravimetric analysis (TGA) plots were recorded on a Rigaku TG-DTA 8122 thermal analyzer in 30–800 °C at a heating rate of 20 °C/min under  $\text{N}_2$  atmosphere.

### *1.2 Synthesis of $\text{NH}_2\text{-UiO-66}$*

A mixture of  $\text{ZrCl}_4$  (18.11 mg, 0.1 mmol), 2-aminoterephthalic acid ( $\text{NH}_2\text{-BDC}$ ) (23.3 mg, 0.1 mmol),  $\text{CH}_3\text{COOH}$  (1.374 mL), and DMF (10 mL) was treated under sonification for 1 h, and heated at 120 °C for 24 h under hydrothermal conditions. The resulting solids were washed several times with DMF,  $\text{C}_2\text{H}_5\text{OH}$ , and  $\text{CH}_3\text{OH}$  and dried under vacuum at 120 °C for 24h.

### *1.3 Synthesis of $\text{bis-PC}_2@\text{NH}_2\text{-UiO-66}$*

3,3'-Divinyl-1,1'-(1,2-ethanediyl)diimidazolium dibromide (*bis-C<sub>2</sub>*) was prepared according to the literature method [28]. A mixture of  $\text{NH}_2\text{-UiO-66}$  (400 mg) and *bis-C<sub>2</sub>* (400 mg) was stirred in  $\text{CH}_3\text{OH}$  solution (20 mL) at room temperature under vacuum for 24 h. Then, 2,2'-azobis(isobutyronitrile) (AIBN, 50 mg) in  $\text{CH}_3\text{OH}$  (5 mL) was added and then heated to 65 °C under  $\text{N}_2$  atmosphere for 24 h. After that, additional  $\text{CH}_3\text{OH}$  solution (5 mL) of AIBN (50 mg) was added, which was heated at 65 °C under  $\text{N}_2$  atmosphere for 48 h. The resulting white solids were washed with  $\text{CH}_3\text{OH}$  for three times, and dried at 120 °C under vacuum for 12 h.

### *1.4 Synthesis of $\text{bis-PC}_2@\text{NH}_2\text{-UiO-66}@\text{COF}$*

A mixture of *bis*-PC<sub>2</sub>@NH<sub>2</sub>-UiO-66 (40 mg), dimethoxyterephthaldehyde (DMTP) (93 mg), CH<sub>3</sub>COOH (0.4 mL, 6 M) and *n*-butyl alcohol (2 mL) in a Pyrex tube (10 mL) was degassed through three freeze-pump-thaw cycles. And then, 1,3,5-tri-(4-aminophenyl)benzene (TAPB) (112 mg) and *o*-dichlorobenzene (2 mL) were added to the solution, which was degassed through three freeze-pump-thaw cycles. The tube was flame sealed and heated at 120 °C for three days. After cooling to room temperature, the precipitate was isolated by centrifugation and washed with THF for three times. Then the powder material was immersed in THF solution and dried at 120 °C under vacuum for 12 h to get the as-synthesized *bis*-PC<sub>2</sub>@NH<sub>2</sub>-UiO-66@COF. In addition, *bis*-PC<sub>2</sub>@NH<sub>2</sub>-UiO-66@COF was treated by saturated NaCl solution to yield *bis*-PC<sub>2</sub>(Cl)@NH<sub>2</sub>-UiO-66@COF.

### 1.5 Sorption experiments

In the batch sorption experiments, the removal percentage (%), the sorption capacity at equilibrium,  $q_e$  (mg g<sup>-1</sup>), and the distribution coefficient,  $K_d$  (mL g<sup>-1</sup>), were calculated by the following equations:

$$\text{Removal percentage (\%)} = \frac{c_0 - c_e}{c_0} \times 100\% \quad (\text{Eq. 1})$$

$$q_e = \frac{c_0 - c_e}{m} \times V \quad (\text{Eq. 2})$$

$$k_d = \frac{c_0 - c_e}{c_e} \times \frac{V}{m} \quad (\text{Eq. 3})$$

in which  $c_0$  (mg g<sup>-1</sup>) and  $c_e$  (mg g<sup>-1</sup>) are the initial and equilibrium concentrations of adsorbate,  $V$  (mL) is the volume of solution, and  $m$  (g) is the mass of sorbent.

***ReO<sub>4</sub><sup>-</sup> sorption data fitting by kinetics models.*** In the sorption experiment, *bis*-PC<sub>2</sub>@NH<sub>2</sub>-UiO-66@COF (20 mg) was added to a water solution of ReO<sub>4</sub><sup>-</sup> (5 mL, 25 ppm). The samples were collected after stirring for 30 s, 45 s, 1 min, 2 min, 5 min, 10 min, 15 min, 20 min, 30 min, 45 min, and 1 h. The concentrations of ReO<sub>4</sub><sup>-</sup> remaining in the water phase were determined by ICP-MS. The equation of linearized form of pseudo-second-order model is

$$\frac{t}{q_t} = \frac{t}{q_e} + \frac{1}{k_2 q_e^2} \quad (\text{Eq. 4})$$

where the measured  $q_t$  is the uptake amount of ReO<sub>4</sub><sup>-</sup> at  $t$  min (mg g<sup>-1</sup>),  $q_e$  is the uptake amount of ReO<sub>4</sub><sup>-</sup> at equilibrium (mg g<sup>-1</sup>), and  $k_2$  is the pseudo-second-order rate constant (g mg<sup>-1</sup> min<sup>-1</sup>). The fitting model parameter and correlation coefficient are listed in [Table S1](#).

***ReO<sub>4</sub><sup>-</sup> sorption data fitting by isotherm models.*** In the sorption experiment, *bis*-PC<sub>2</sub>@NH<sub>2</sub>-UiO-66@COF or *bis*-PC<sub>2</sub>(Cl)@NH<sub>2</sub>-UiO-66@COF (5 mg) was added to a water solution (5 mL) of ReO<sub>4</sub><sup>-</sup> at a given concentration (20–3000 ppm), which was stirred for 12 h to ensure the equilibrium ([Table S2](#)). The concentration of ReO<sub>4</sub><sup>-</sup> remaining in the water phase was determined by ICP-MS.

The Langmuir and Freundlich sorption models were used to study the removal thermodynamics of ReO<sub>4</sub><sup>-</sup> by *bis*-PC<sub>2</sub>@NH<sub>2</sub>-UiO-66@COF and *bis*-PC<sub>2</sub>(Cl)@NH<sub>2</sub>-UiO-66@COF ([Table S3](#)). In the Langmuir model, the sorption of ReO<sub>4</sub><sup>-</sup> was assumed on a homogenous surface of sorbent to follow a monolayer sorption process. The equation of the Langmuir model is

$$\frac{c_e}{q_e} = \frac{1}{q_m k_L} + \frac{c_e}{q_m} \quad (\text{Eq. 5})$$

in which  $c_e$  is the equilibrium concentration of Re in  $\text{ReO}_4^-$  ( $\text{mg g}^{-1}$ ),  $q_e$  and  $q_m$  are the equilibrium and maximum Re sorption amounts ( $\text{mg g}^{-1}$ ), and  $k_L$  is the constant indirectly related to the sorption amount and sorption energy ( $\text{L mg}^{-1}$ ), characterizing the affinity of  $\text{ReO}_4^-$  anion with sorbent. The fitting line was obtained by plotting  $c_e/q_e$  against  $c_e$ , and  $q_m$  and  $k_L$  can be calculated from the slope and intercept.

Regarding the Freundlich sorption model, it is based on a heterogeneous surface, suggesting different binding energies between  $\text{ReO}_4^-$  and the surface sites of sorbent. The equation of the Freundlich model is

$$\ln q_e = \ln k_F + \frac{1}{n} \ln c_e \quad (\text{Eq. 6})$$

in which  $c_e$  and  $q_e$  are the equilibrium concentration of Re in  $\text{ReO}_4^-$  ( $\text{mg g}^{-1}$ ) and equilibrium Re sorption amount ( $\text{mg g}^{-1}$ ), and  $k_F$  and  $n$  are the Freundlich constants related to the sorption amount and sorption intensity, characterizing the affinity of  $\text{ReO}_4^-$  with sorbent.

**Stability.** Stability was studied by immersing *bis*-PC<sub>2</sub>@NH<sub>2</sub>-UiO-66@COF into NaOH solution (1 or 2 M), HNO<sub>3</sub> solution (1 or 3 M), as well as different pH values (1–13) for two days at room temperature. The solid was separated for PXRD test and Brunauer-Emmett-Teller (BET) surface area analysis.

**Effect of pH.** The effect of pH on  $\text{ReO}_4^-$  sorption was performed in the solutions of pH = 0–14. *bis*-PC<sub>2</sub>@NH<sub>2</sub>-UiO-66@COF (20 mg) was added into a water solution

of  $\text{ReO}_4^-$  (1 mL, 50 ppm). The sample was stirred for 2 h to ensure the equilibrium. The concentrations of  $\text{ReO}_4^-$  remaining in the water phase were determined by ICP-MS.

**Anion Competition.** The as-synthesized  $\text{bis-PC}_2@\text{NH}_2\text{-UiO-66@COF}$  (10 mg) was immersed in an aqueous solution (1 mL) containing  $\text{KReO}_4$  (0.5 mmol) and  $\text{Na}_n\text{X}$  (0.5 mmol,  $n = 1$  or  $2$ ,  $\text{X} = \text{NO}_3^-$ ,  $\text{NO}_2^-$ ,  $\text{ClO}_4^-$ ,  $\text{CO}_3^{2-}$  or  $\text{SO}_4^{2-}$ ) at room temperature for 12 h. The concentration of  $\text{ReO}_4^-$  remaining in the water phase was determined by ICP-MS. To test the anion competition of  $\text{ReO}_4^-$  to  $\text{NO}_3^-$  or  $\text{SO}_4^{2-}$ , the as-synthesized  $\text{bis-PC}_2@\text{NH}_2\text{-UiO-66@COF}$  (10 mg) was immersed in an aqueous solution (1 mL) containing  $\text{KReO}_4$  (0.1 mmol) and  $\text{NaNO}_3$  or  $\text{Na}_2\text{SO}_4$  (0.1, 0.5, 1, 2, and 10 mmol) at room temperature for 12 h. The concentration of  $\text{ReO}_4^-$  remaining in the water phase was determined by ICP-MS.

**Sorption in low active waste stream.** The simulated Hanford low active waste (LAW) stream was prepared (Table S4), in which  $\text{TcO}_4^-$  was replaced with  $\text{ReO}_4^-$ .  $\text{bis-PC}_2@\text{NH}_2\text{-UiO-66@COF}$  (100 mg) was added to the simulated waste (1 mL), which was stirred for 6 h. The concentration of  $\text{ReO}_4^-$  remaining in the water phase was determined by ICP-MS.

**Sorption in alkaline high-level waste stream.** The simulated Savannah River Site (SRS) high level waste (HLW) stream was prepared (Table S5), in which  $\text{TcO}_4^-$  was replaced with  $\text{ReO}_4^-$ . In a batch experiment,  $\text{bis-PC}_2@\text{NH}_2\text{-UiO-66@COF}$  (100 or 200 mg) was added to the simulated waste (2 mL), which was stirred for 6 h. The concentration of  $\text{ReO}_4^-$  remaining in the water phase was determined by ICP-MS.

**Recyclability.** In the first cycle, *bis*-PC<sub>2</sub>@NH<sub>2</sub>-UiO-66@COF (60 mg) was immersed in an aqueous solution of ReO<sub>4</sub><sup>−</sup> (15 mL, 50 ppm) for 4 h and the concentration of ReO<sub>4</sub><sup>−</sup> remaining in the water phase was determined by ICP-MS. After that, the ReO<sub>4</sub><sup>−</sup> adsorbed material was eluted with 1 mol/L NaCl solution overnight (with several solvent changes) and the solid was collected by centrifugation. Such recovered material was then subject to the next cycling test.

**Synthesis of *bis*-C<sub>2</sub>:** The synthesis of *bis*-C<sub>2</sub> using the same methods as our previous reported. A mixture of 1-vinylimidazole (18.8 g, 0.2 mol), 1,2-dibromoethane (18.7 g, 0.1 mol), and acetonitrile (150 mL) was heated at 60 °C under N<sub>2</sub> atmosphere for 48 h. After naturally cooling to room temperature, the obtained white solid was washed by ethyl ether for several times and dried overnight under vacuum. Yield: 27.75 g (74%). <sup>1</sup>H NMR (400 MHz, DMSO-*d*<sub>6</sub>): δ (ppm) 9.58 (s, 1H), 8.22 (s, 1H), 7.97 (s, 1H), 7.31 (dd, *J* = 16.0, 8.0 Hz, 1H), 5.98 (dd, *J* = 16.0, 4.0 Hz, 1H), 5.42 (dd, *J* = 8.0, 2.4 Hz, 1H), 4.24 (dd, *J* = 12.0, 4.0 Hz, 2H).

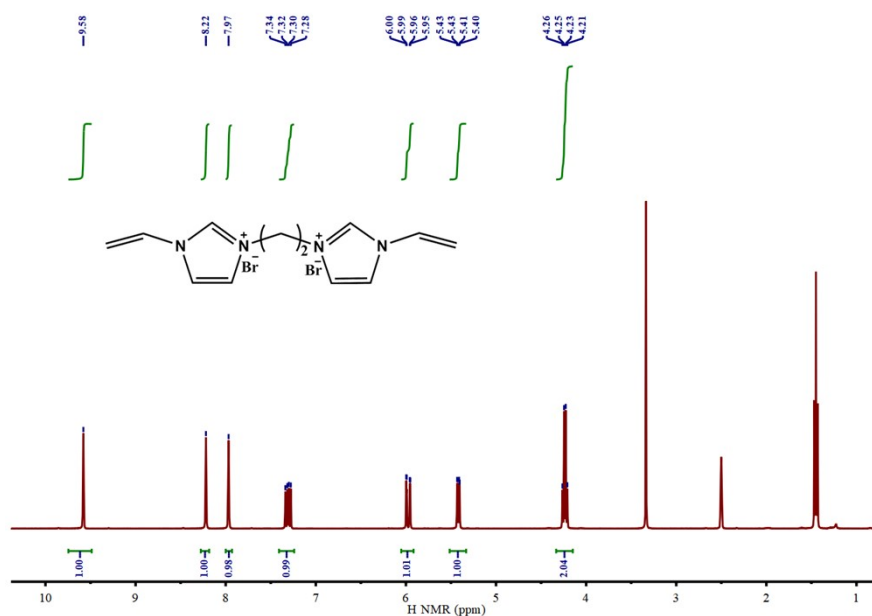

**Figure S1.** <sup>1</sup>H NMR spectra of *bis*-C<sub>2</sub>.

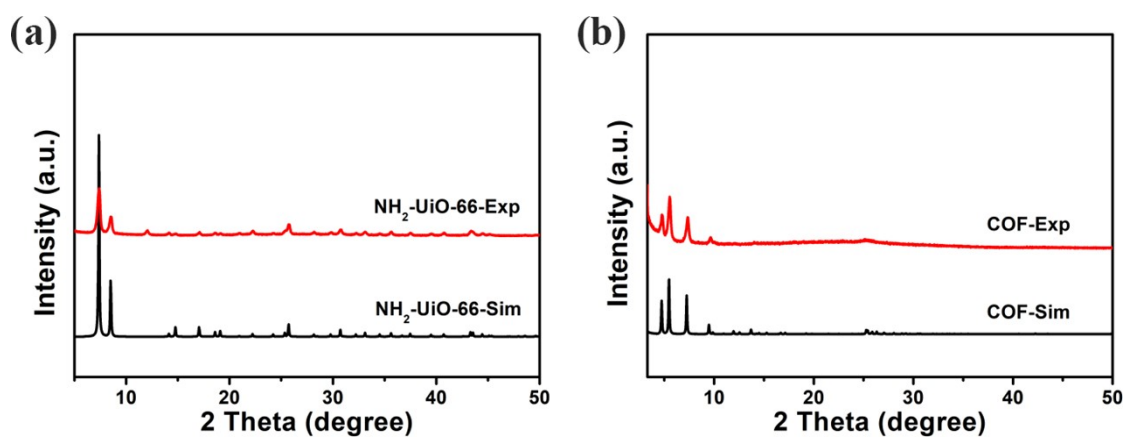

**Figure S2.** The comparison of experimental PXRD pattern of  $\text{NH}_2\text{-UiO-66}$  (a) and COF (b) with simulated PXRD patterns.

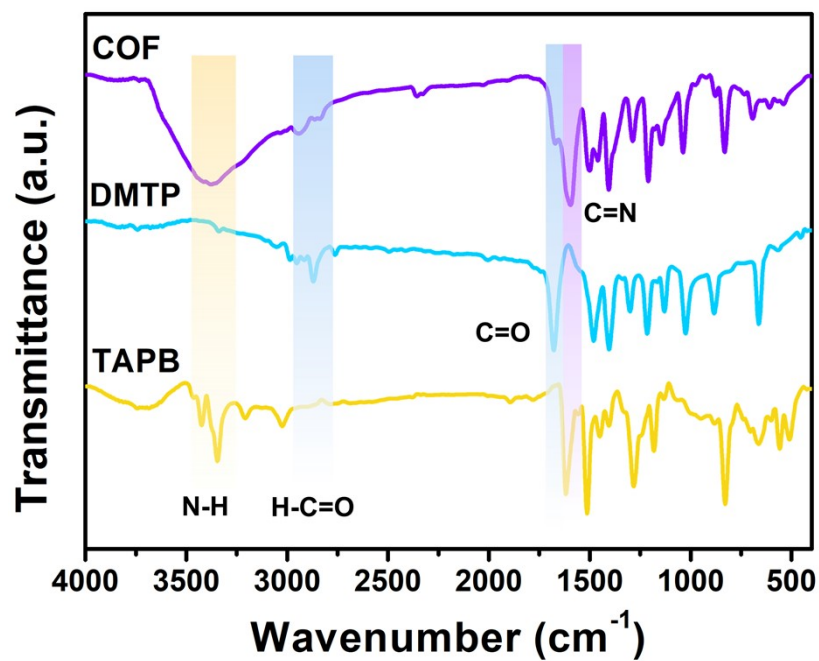

**Figure S3.** FT-IR spectra of TAPB (yellow), DMTP (blue) and COF (purple).

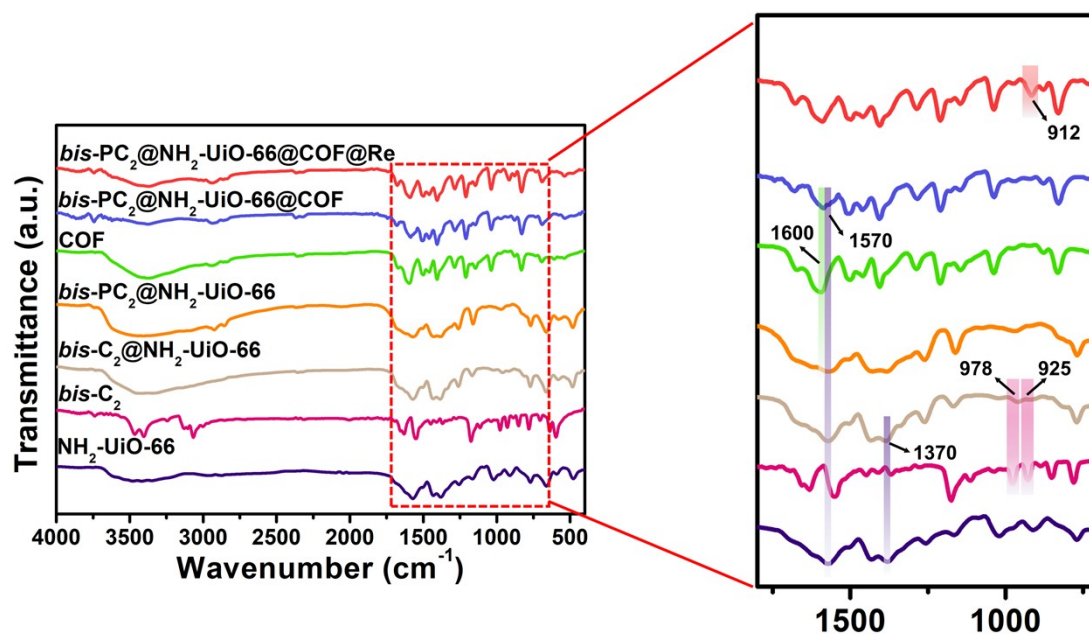

**Figure S4.** FT-IR spectra of NH<sub>2</sub>-UiO-66, *bis*-C<sub>2</sub>, *bis*-C<sub>2</sub>@NH<sub>2</sub>-UiO-66, *bis*-PC<sub>2</sub>@NH<sub>2</sub>-UiO-66, COF, *bis*-PC<sub>2</sub>@NH<sub>2</sub>-UiO-66@COF and *bis*-PC<sub>2</sub>@NH<sub>2</sub>-UiO-66@COF@Re.

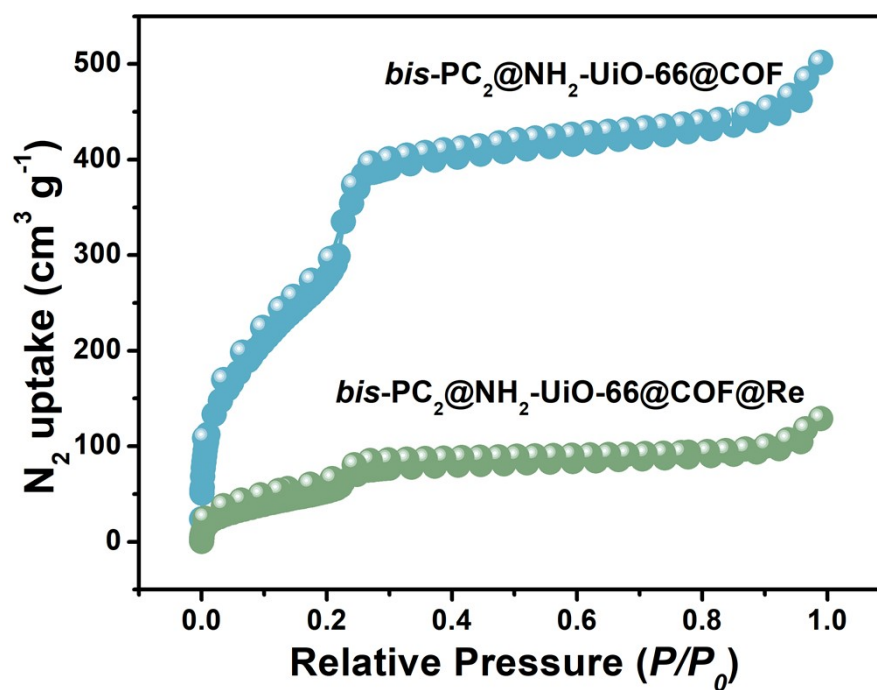

**Figure S5.** The N<sub>2</sub> sorption isotherms of *bis*-PC<sub>2</sub>@NH<sub>2</sub>-UiO-66@COF and *bis*-PC<sub>2</sub>@NH<sub>2</sub>-UiO-66@COF@Re.

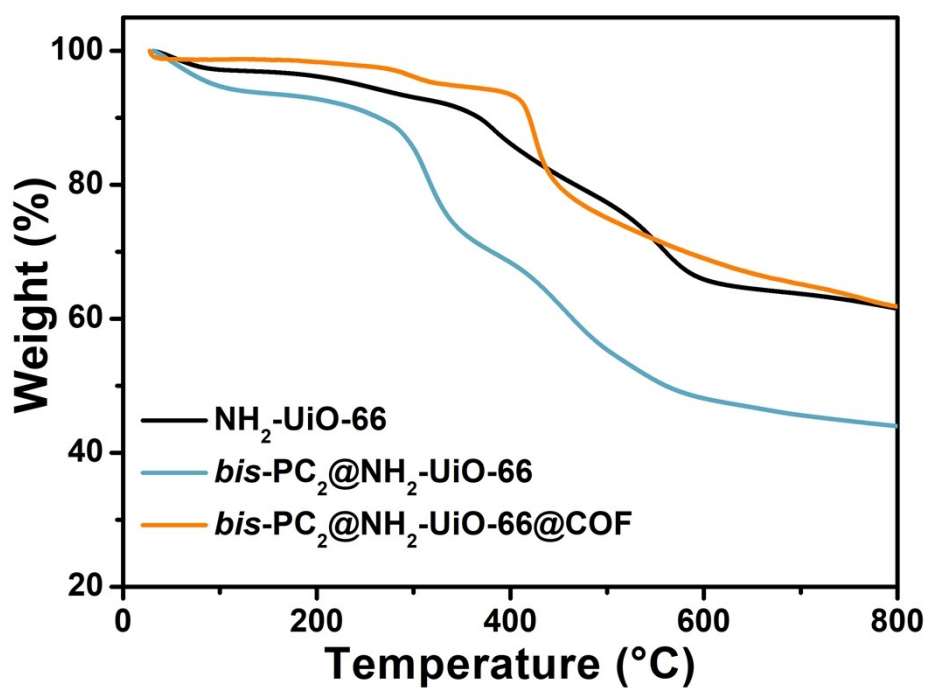

**Figure S6.** TGA plots of NH<sub>2</sub>-UiO-66, bis-PC<sub>2</sub>@NH<sub>2</sub>-UiO-66 and bis-PC<sub>2</sub>@NH<sub>2</sub>-UiO-66@COF.

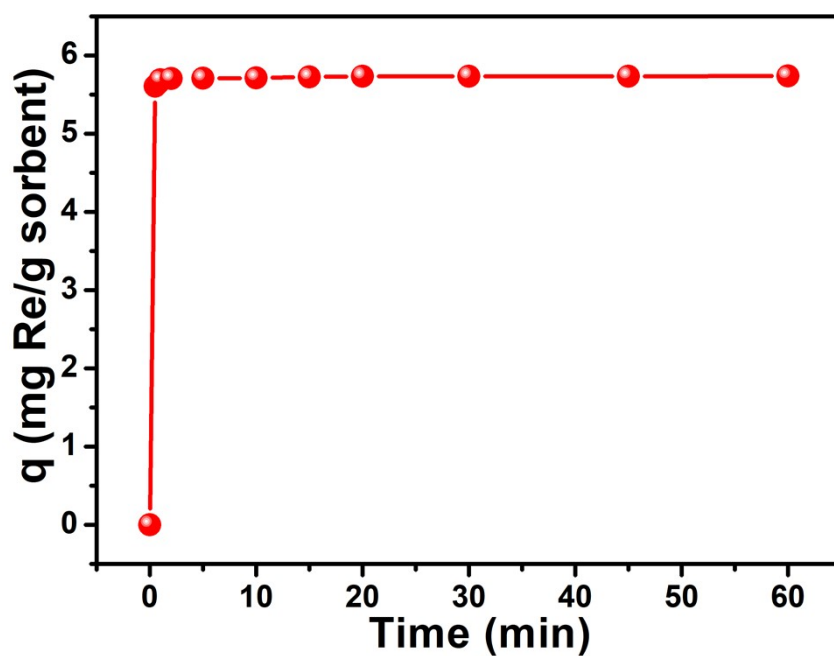

**Figure S7** Sorption kinetics of ReO<sub>4</sub><sup>-</sup> by bis-PC<sub>2</sub>@NH<sub>2</sub>-UiO-66@COF, with the function of  $q$  vs contact time.

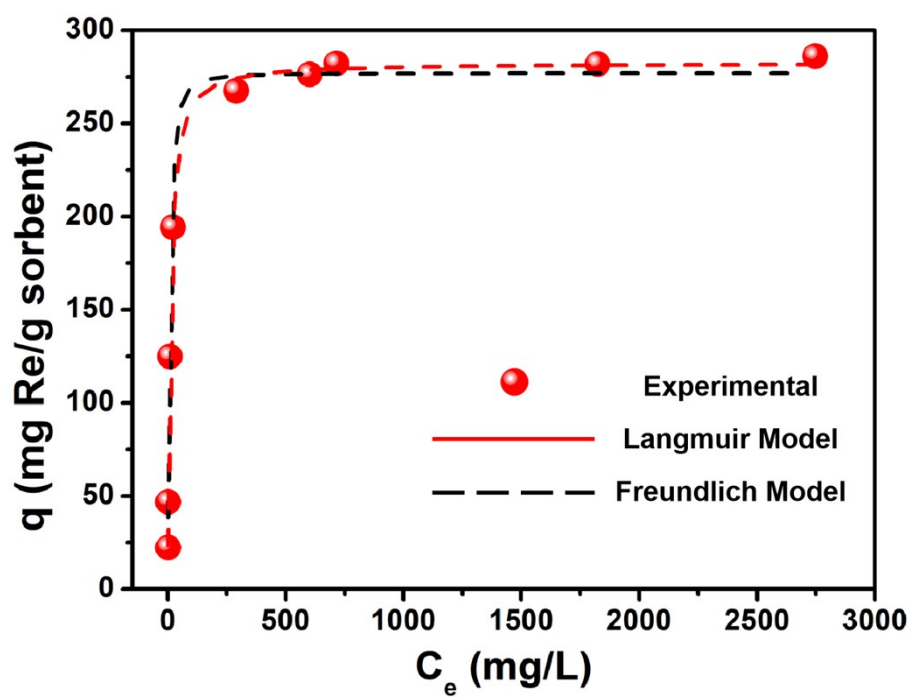

(a)

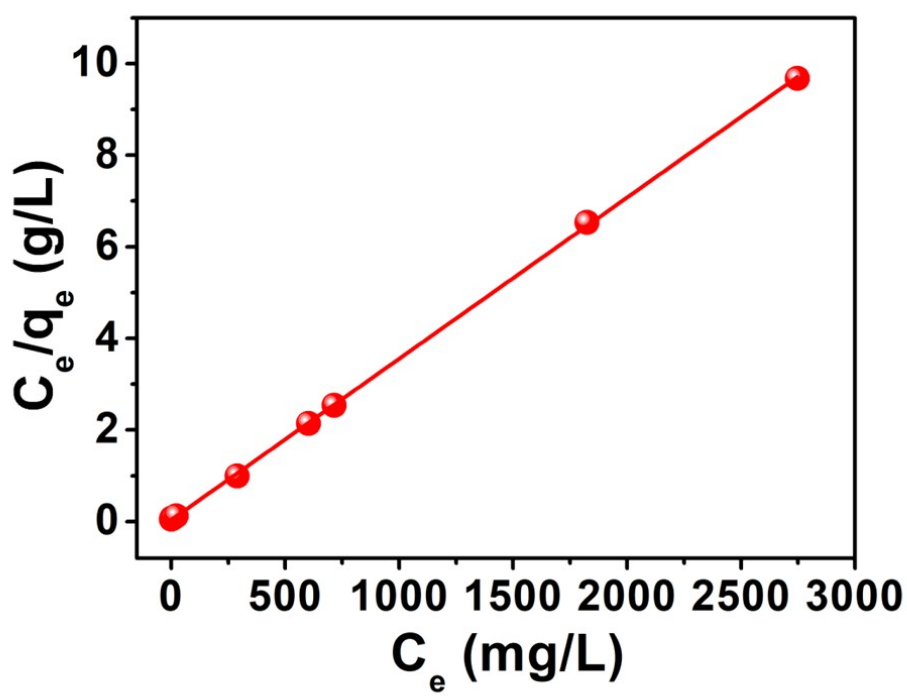

(b)

**Figure S8** (a) Sorption isotherm of *bis*-PC<sub>2</sub>@NH<sub>2</sub>-UiO-66@COF for Re. (b) Linear regression by fitting the equilibrium data using the Langmuir sorption model.

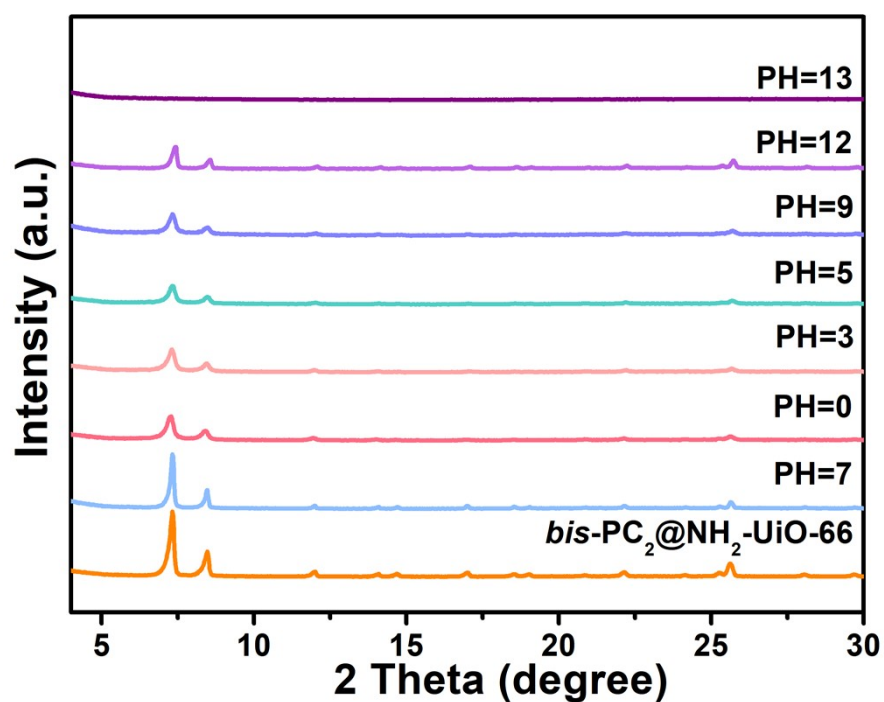

**Figure S9.** The PXRD patterns of *bis*-PC<sub>2</sub>@NH<sub>2</sub>-UiO-66 under different pH conditions.

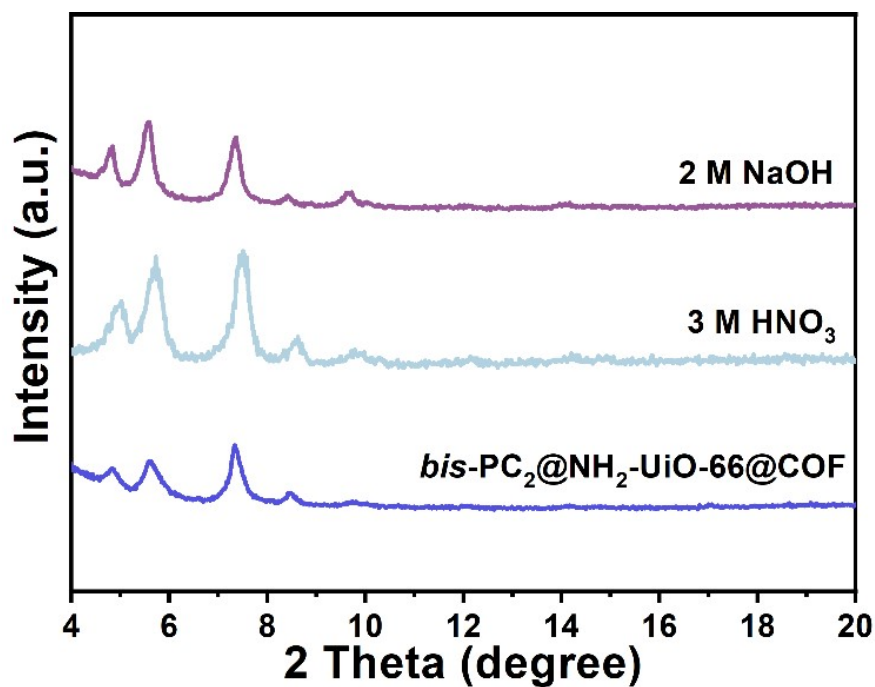

**Figure S10.** The PXRD patterns of *bis*-PC<sub>2</sub>@NH<sub>2</sub>-UiO-66@COF as well as in 2 M NaOH and 3 M HNO<sub>3</sub> solutions.

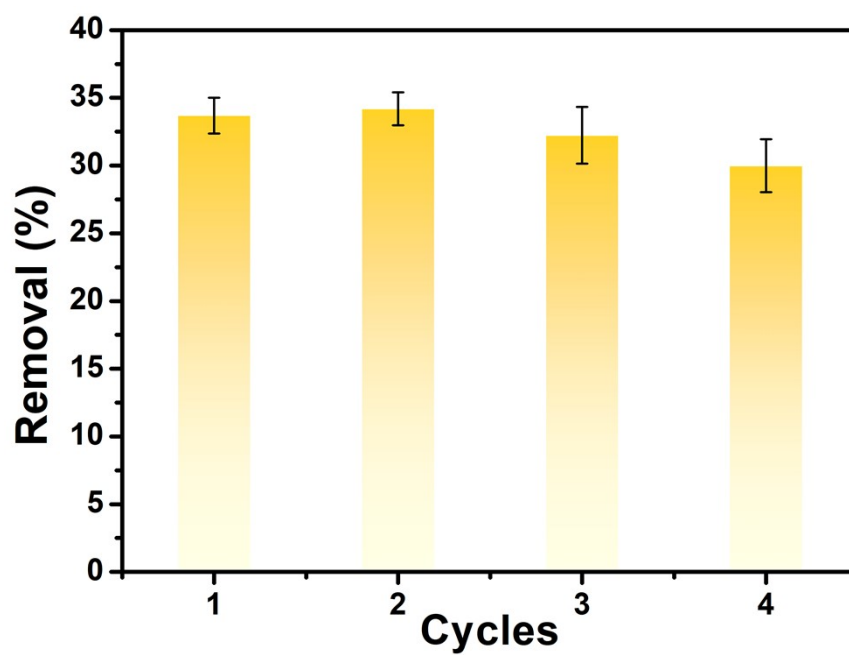

**Figure S11.** The reversibility of *bis*-PC<sub>2</sub>@NH<sub>2</sub>-UiO-66@COF under the condition of 2 M NaOH.

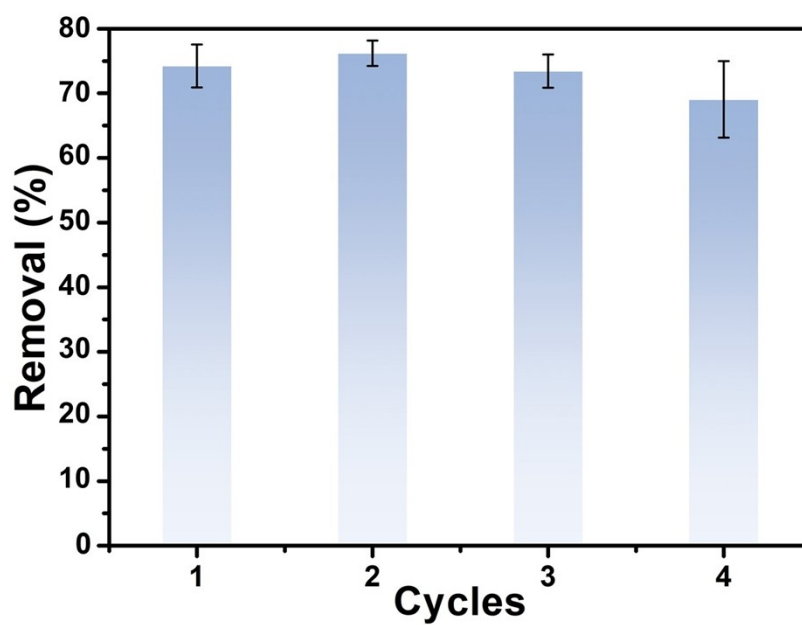

**Figure S12.** The reversibility of *bis*-PC<sub>2</sub>@NH<sub>2</sub>-UiO-66@COF under the condition of 3 M HNO<sub>3</sub>.

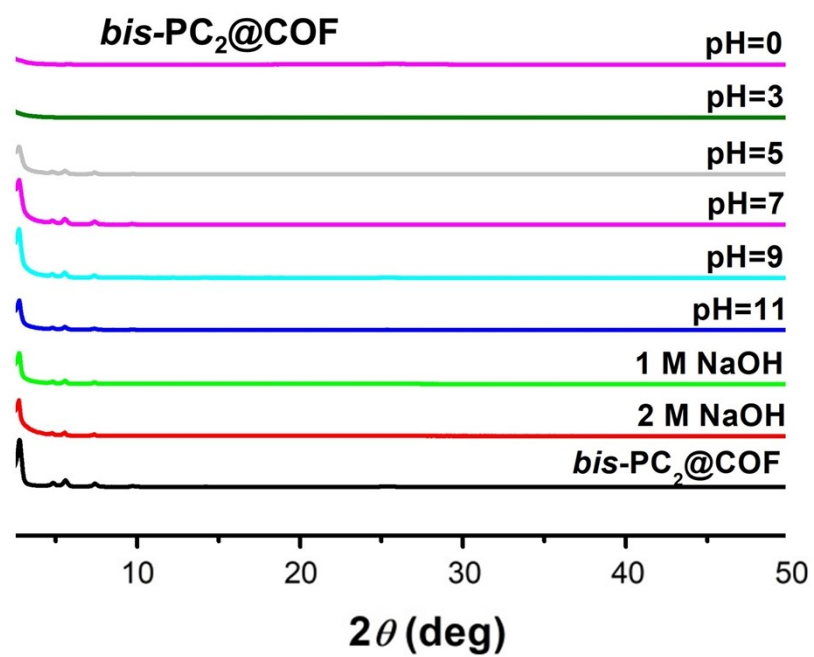

**Figure S13.** PXRD patterns of *bis*-PC<sub>2</sub>@COF under different pH for 2 h.

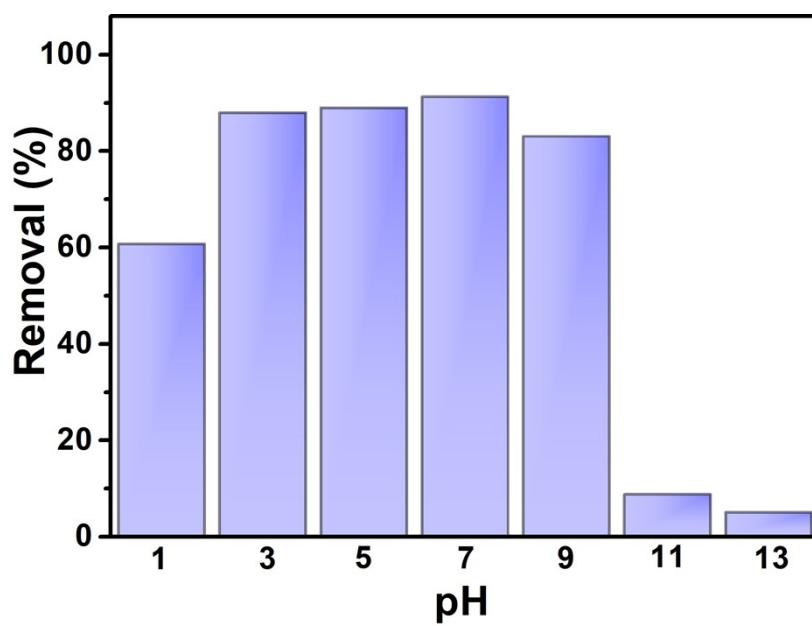

(a)

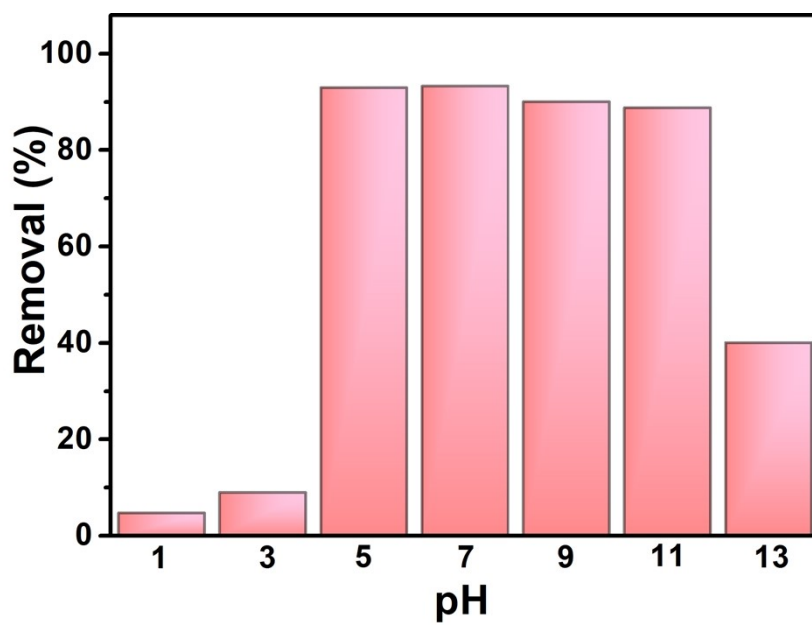

(b)

**Figure S14.** Effect of pH on  $\text{ReO}_4^-$  uptake by *bis*- $\text{PC}_2@ \text{NH}_2\text{-UiO-66}$  and *bis*- $\text{PC}_2@ \text{COF}$ .

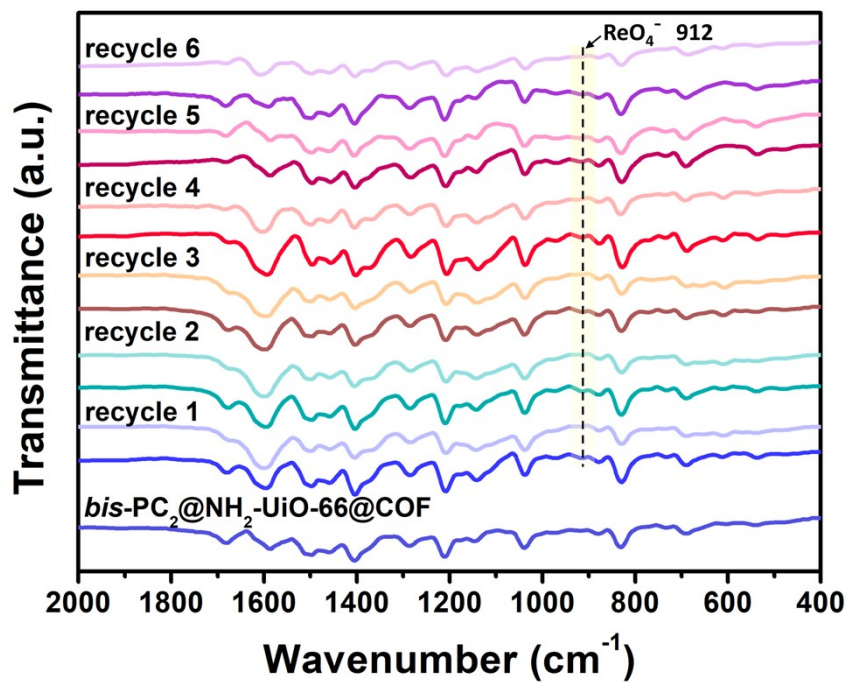

**Figure S15.** FT-IR spectra of *bis-PC*<sub>2</sub>@NH<sub>2</sub>-UiO-66@COF after six cycles of  $\text{ReO}_4^-$  sorption.

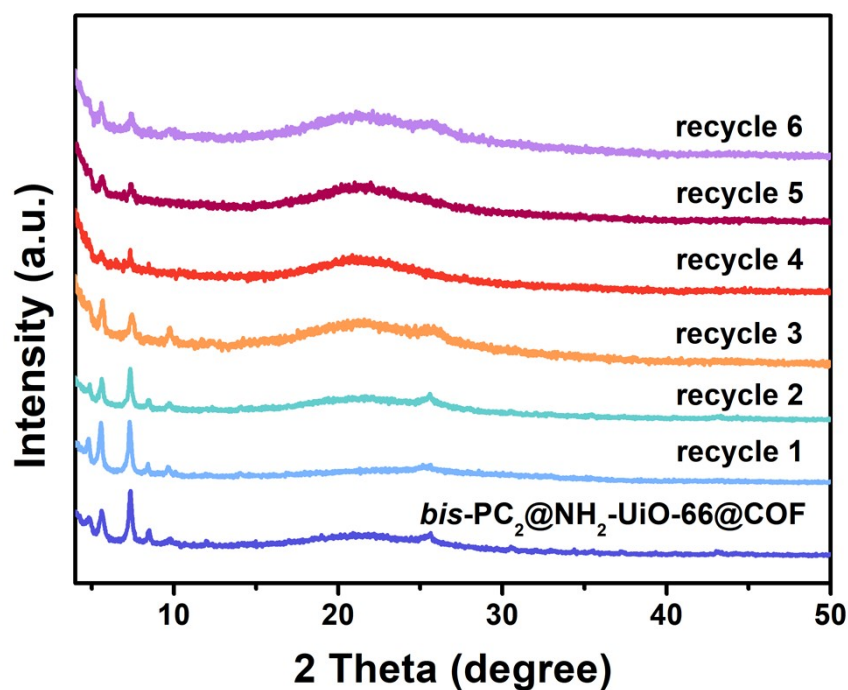

**Figure S16.** PXRD patterns of *bis-PC*<sub>2</sub>@NH<sub>2</sub>-UiO-66@COF after six cycles of  $\text{ReO}_4^-$  sorption.

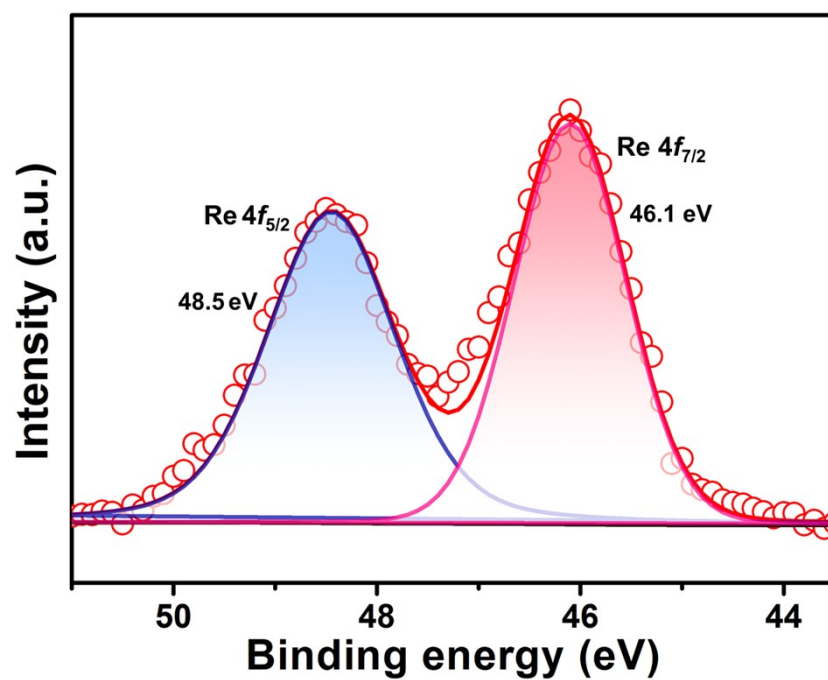

Figure S17. Re 4f XPS spectra of *bis*-PC<sub>2</sub>@NH<sub>2</sub>-UiO-66@COF@Re.

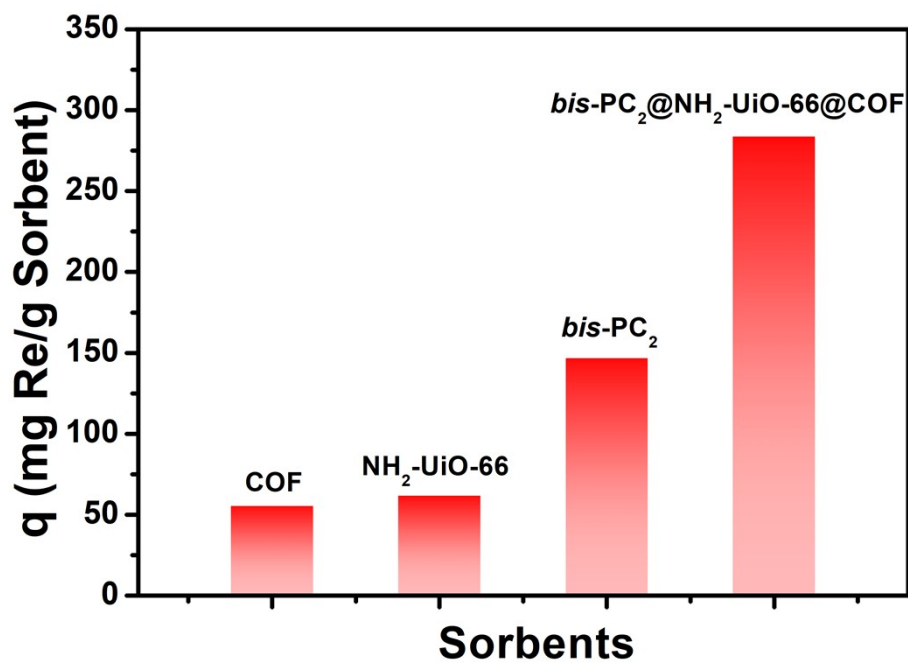

Figure S18. The comparison of ReO<sub>4</sub><sup>-</sup> sorption amounts between the single component (NH<sub>2</sub>-UiO-66, COF, *bis*-PC<sub>2</sub>) and *bis*-PC<sub>2</sub>@NH<sub>2</sub>-UiO-66@COF.

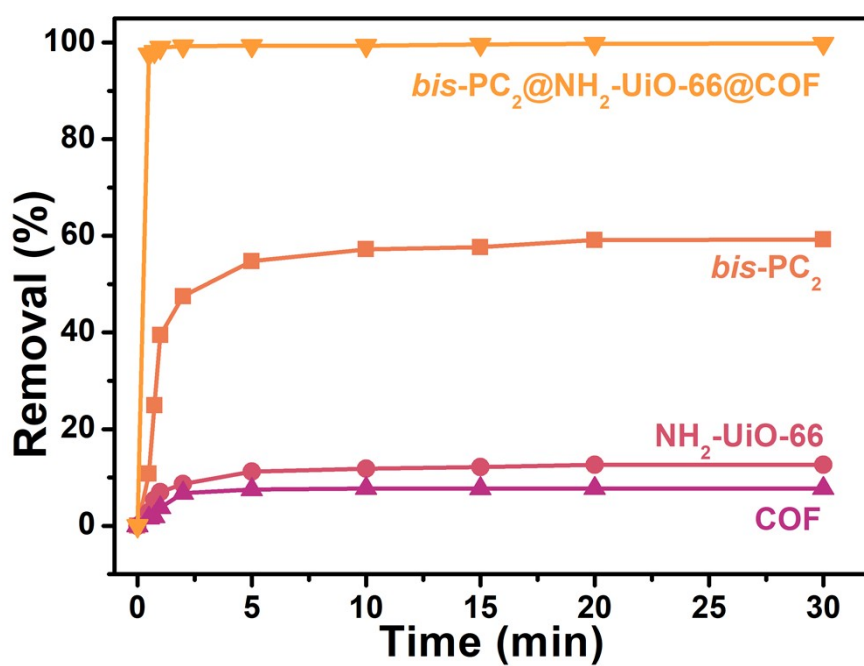

**Figure S19.** The comparison of  $\text{ReO}_4^-$  sorption kinetics between the single component ( $\text{NH}_2\text{-UiO-66}$ ,  $\text{COF}$ , *bis*-PC<sub>2</sub>) and *bis*-PC<sub>2</sub>@NH<sub>2</sub>-UiO-66@COF.

**Table S1.** Model parameters and correlation coefficient for  $\text{ReO}_4^-$  sorption kinetics by *bis*-PC<sub>2</sub>@NH<sub>2</sub>-UiO-66@COF.

| Samples                                                  | Kinetics                                        |                         |        | $K_d(\text{mL/g})$ |
|----------------------------------------------------------|-------------------------------------------------|-------------------------|--------|--------------------|
|                                                          | $k_2$<br>( $\text{g mg}^{-1} \text{min}^{-1}$ ) | $q_e(\text{mg g}^{-1})$ | $R^2$  |                    |
| <i>bis</i> -PC <sub>2</sub> @NH <sub>2</sub> -UiO-66@COF | 10.85                                           | 5.73                    | 0.9999 | $1.12 \times 10^5$ |
| <i>bis</i> -PC <sub>2</sub> @COF                         | 3.66                                            | 23.27                   | 0.999  | $1.72 \times 10^4$ |
| <i>bis</i> -PC <sub>2</sub> @NH <sub>2</sub> -UiO-66     | 16.76                                           | 5.56                    | 0.995  | $4.03 \times 10^4$ |

**Table S2.** Removal performances of *bis*-PC<sub>2</sub>@NH<sub>2</sub>-UiO-66@COF from the ReO<sub>4</sub><sup>−</sup> solutions at different concentrations (50 to 3000 ppm).

| Concentration (ppm) | C <sub>0</sub> (ppm) | C <sub>e</sub> (ppm) | q <sub>e</sub> (mg g <sup>−1</sup> ) |
|---------------------|----------------------|----------------------|--------------------------------------|
| 20                  | 23.35                | 1.15                 | 22.2                                 |
| 50                  | 50.2                 | 3.4                  | 46.8                                 |
| 100                 | 133.7                | 8.81                 | 124.9                                |
| 200                 | 218.2                | 24                   | 194.2                                |
| 500                 | 533.6                | 266.1                | 267.5                                |
| 800                 | 868.6                | 592.3                | 276.3                                |
| 1000                | 997.9                | 715.6                | 282.3                                |
| 2000                | 1824                 | 1542                 | 282                                  |
| 3000                | 3053                 | 2767                 | 286                                  |

**Table S3.** Fitting results of  $\text{ReO}_4^-$  sorption by *bis*-PC<sub>2</sub>@NH<sub>2</sub>-UiO-66@COF based on the Langmuir and Freundlich models.

| Samples                                                      | Langmuir                    |                             |         | Freundlich                                                             |       |       |
|--------------------------------------------------------------|-----------------------------|-----------------------------|---------|------------------------------------------------------------------------|-------|-------|
|                                                              | $q_m$ (mg g <sup>-1</sup> ) | $k_L$ (L mg <sup>-1</sup> ) | $R^2$   | $k_F$ (L <sup><math>n</math></sup> /mol <sup><math>n-1</math></sup> g) | $n$   | $R^2$ |
| <i>bis</i> -PC <sub>2</sub> @NH <sub>2</sub> -UiO-66@COF     | 284.09                      | 0.099                       | >0.9999 | 277.02                                                                 | 0.055 | 0.96  |
| <i>bis</i> -PC <sub>2</sub> (Cl)@NH <sub>2</sub> -UiO-66@COF | 357.14                      | 0.029                       | 0.9889  | 96.65                                                                  | 5.54  | 0.93  |

**Table S4.** Composition of Hanford Low Activity Waste (LAW) Melter Recycle Stream.

| Anion                                                        | Concentration<br>(mol L <sup>-1</sup> ) | Anion: TcO <sub>4</sub> <sup>-</sup><br>(mole ratio) |
|--------------------------------------------------------------|-----------------------------------------|------------------------------------------------------|
| TcO <sub>4</sub> <sup>-</sup> /ReO <sub>4</sub> <sup>-</sup> | 1.94×10 <sup>-4</sup>                   | 1.0                                                  |
| NO <sub>3</sub> <sup>-</sup>                                 | 6.07×10 <sup>-2</sup>                   | 314                                                  |
| Cl <sup>-</sup>                                              | 6.39×10 <sup>-2</sup>                   | 330                                                  |
| NO <sub>2</sub> <sup>-</sup>                                 | 1.69×10 <sup>-1</sup>                   | 873                                                  |
| SO <sub>4</sub> <sup>2-</sup>                                | 6.64×10 <sup>-6</sup>                   | 0.343                                                |
| CO <sub>3</sub> <sup>2-</sup>                                | 4.30×10 <sup>-5</sup>                   | 0.222                                                |

**Table S5.** Composition of Savannah River Site (SRS) High-Level Waste (HLW)

| Stream.                                                      |                                         |                                                      |
|--------------------------------------------------------------|-----------------------------------------|------------------------------------------------------|
| Anion                                                        | Concentration<br>(mol L <sup>-1</sup> ) | Anion: TcO <sub>4</sub> <sup>-</sup><br>(mole ratio) |
| TcO <sub>4</sub> <sup>-</sup> /ReO <sub>4</sub> <sup>-</sup> | 7.92×10 <sup>-5</sup>                   | 1.0                                                  |
| NO <sub>3</sub> <sup>-</sup>                                 | 2.6                                     | 32819                                                |
| OH <sup>-</sup>                                              | 1.33                                    | 16788                                                |
| NO <sub>2</sub> <sup>-</sup>                                 | 1.34×10 <sup>-1</sup>                   | 1691                                                 |
| SO <sub>4</sub> <sup>2-</sup>                                | 5.21×10 <sup>-1</sup>                   | 6576                                                 |
| CO <sub>3</sub> <sup>2-</sup>                                | 2.6×10 <sup>-2</sup>                    | 328                                                  |
